# Supplementary material
Source: publisher figshare collection journal article supplement (https://acs.figshare.com/ndownloader/files/24994577)
Supplement: Supplementary file 1 [file 24994577]

# **Organosulfur Precursor for Atomic Layer Deposition of High-Quality Metal Sulfide Films**

Hao Li,<sup>†</sup> Ran Zhao,<sup>†</sup> Jiahao Zhu,<sup>†</sup> Zheng Guo, Wei Xiong, Xinwei Wang\*

School of Advanced Materials, Shenzhen Graduate School, Peking University, Shenzhen 518055, China

<sup>†</sup>These authors contributed equally.

\*Corresponding email: wangxw@pkusz.edu.cn

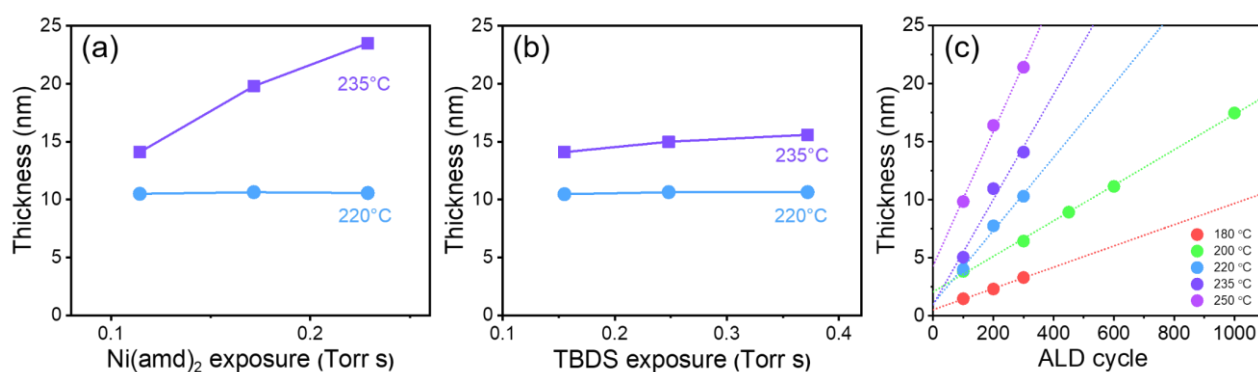

**Figure S1.** (a,b) NiS<sub>x</sub> film growth behavior at 220 and 235 °C: (a) NiS<sub>x</sub> film thickness versus the Ni(amd)<sub>2</sub> exposure, given a fixed TBDS exposure of ~0.15 Torr s, and (b) NiS<sub>x</sub> film thickness versus the TBDS exposure, given a fixed Ni(amd)<sub>2</sub> exposure of ~0.12 Torr s. All the films were deposited by 300 ALD cycles. Notably, the growth at 235 °C was no longer saturated. (c) Thickness of the NiS<sub>x</sub> films deposited at various temperatures with respect to the number of ALD cycles. The exposures of Ni(amd)<sub>2</sub> and TBDS in each ALD cycle were ~0.12 and ~0.15 Torr s, respectively.

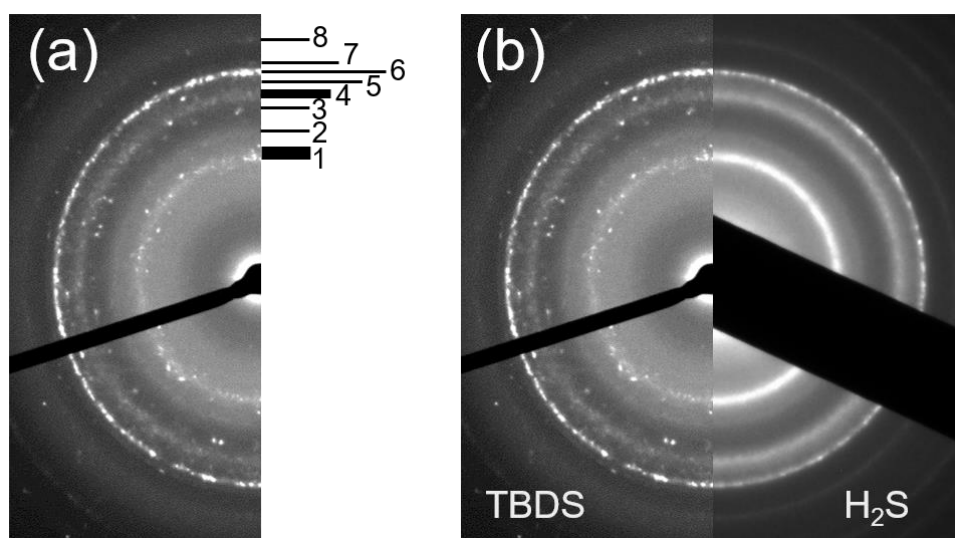

**Figure S2.** (a) Enlarged view of the diffraction pattern shown in Figure 2b. The labeled numbers are used in Table S1 for indexing the diffraction rings. (see Table S1). (b) Side-by-side comparison of the diffraction patterns for the ALD NiS<sub>x</sub> films deposited with TBDS (this work) and H<sub>2</sub>S (*Chem. Mater.* **2016**, 28, 1155).

**Table S1.** Comparison of the d-spacings for the godlevskite Ni<sub>9</sub>S<sub>8</sub> structure (PDF #22-1193) and the values measured by TEM. The label numbers in the last column correspond to the labels of the diffraction rings in Figure S2.

| PDF # 22-1193 |        |           | TEM results  |                           |
|---------------|--------|-----------|--------------|---------------------------|
| (h k l)       | d (Å)  | Intensity | Measured (Å) | Label number in Figure S2 |
| (222)         | 2.8500 | 100.0     | 2.66-2.82    | 1                         |
| (132)         | 2.8000 | 20.0      |              |                           |
| (023)         | 2.7500 | 20.0      |              |                           |
| (203)         | 2.6200 | 10.0      |              |                           |
| (240)         | 2.4000 | 10.0      | 2.34         | 2                         |
| (330)         | 2.3700 | 10.0      |              |                           |
| (241)         | 2.3300 | 40.0      |              |                           |
| (332)         | 2.1200 | 10.0      | 2.10         | 3                         |
| (043)         | 2.1000 | 50.0      |              |                           |
| (243)         | 1.9060 | 30.0      | 1.82-1.90    | 4                         |
| (115)         | 1.8320 | 30.0      |              |                           |
| (153)         | 1.8030 | 90.0      |              |                           |
| (025)         | 1.7950 | 80.0      |              |                           |
| (261)         | 1.7140 | 10.0      | 1.72         | 5                         |
| (530)         | 1.6540 | 80.0      | 1.62         | 6                         |
| (531)         | 1.6250 | 30.0      |              |                           |
| (154)         | 1.6080 | 10.0      | 1.58         | 7                         |
| (006)         | 1.5760 | 10.0      |              |                           |
| (354)         | 1.4390 | 20.0      | 1.42         | 8                         |
| (370)         | 1.4260 | 10.0      |              |                           |
| (264)         | 1.3990 | 10.0      |              |                           |

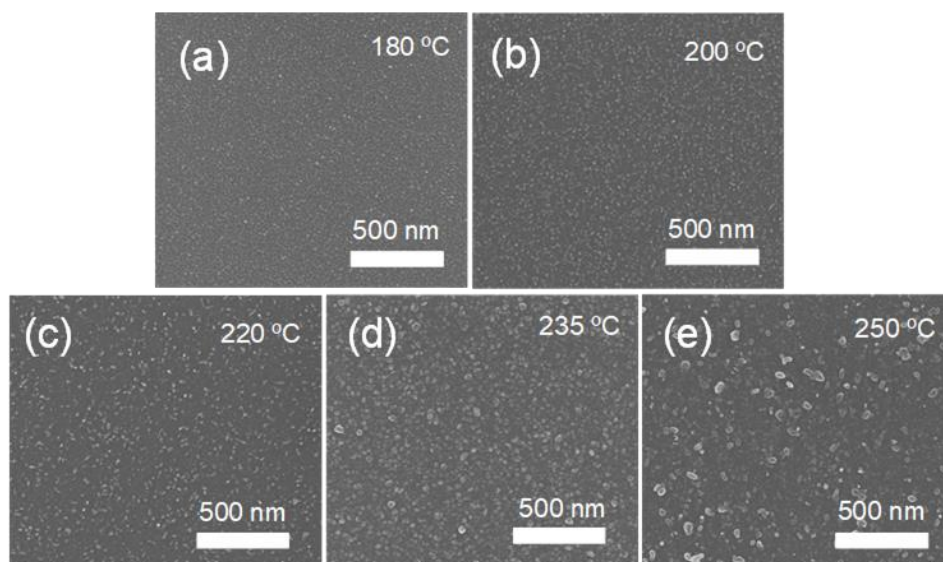

**Figure S3.** SEM images of ~16 nm ALD NiS<sub>x</sub> films deposited at (a) 180 °C, (b) 200 °C, (c) 220 °C, (d) 235 °C, and (e) 250 °C.

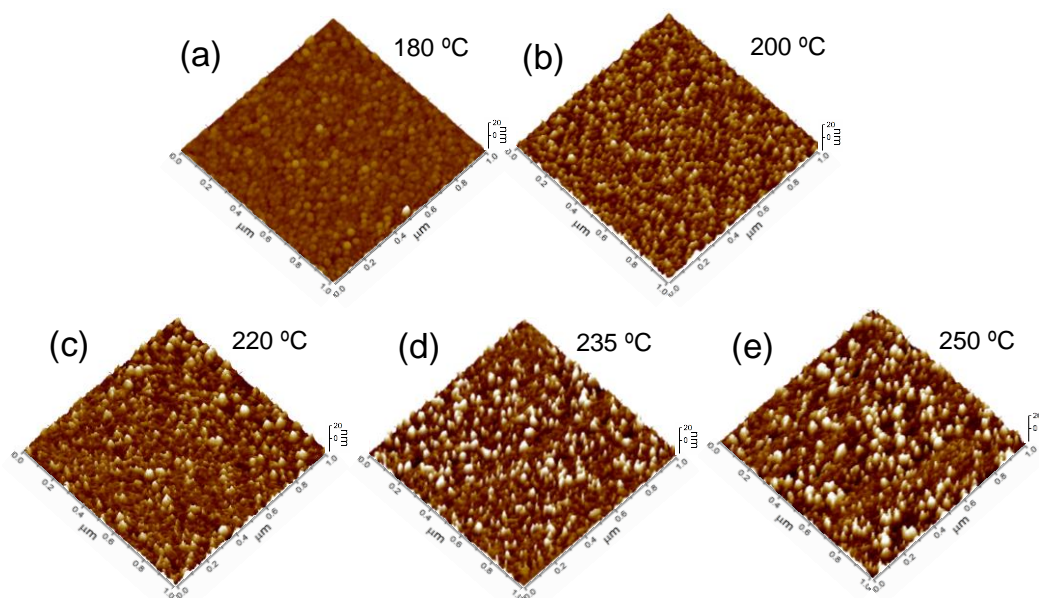

**Figure S4.** AFM images of ~16 nm ALD NiS<sub>x</sub> films deposited at (a) 180 °C, (b) 200 °C, (c) 220 °C, (d) 235 °C, and (e) 250 °C.

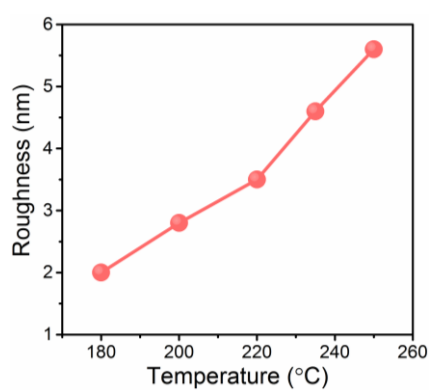

**Figure S5.** Film surface (rms) roughness with respect to the deposition temperature.

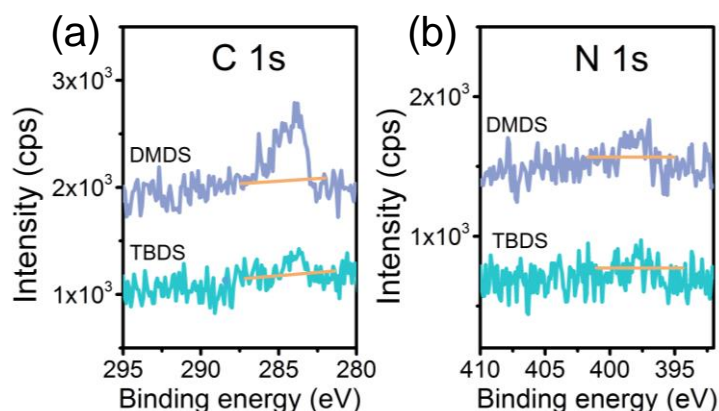

**Figure S6.** Comparison of the impurities for the ALD  $\text{NiS}_x$  films deposited using DMDS or TBDS as the sulfur source. (a) C 1s and (b) N 1s XPS spectra taken on 8–10 nm ALD  $\text{NiS}_x$  films deposited at 200 °C. Prior to the XPS data collection, the  $\text{NiS}_x$  films were subjected to 10 s of  $\text{Ar}^+$ -ion (3 keV) sputtering to remove surface adventitious carbon. The TBDS curves were reproduced from Figure 2j,k for comparison.

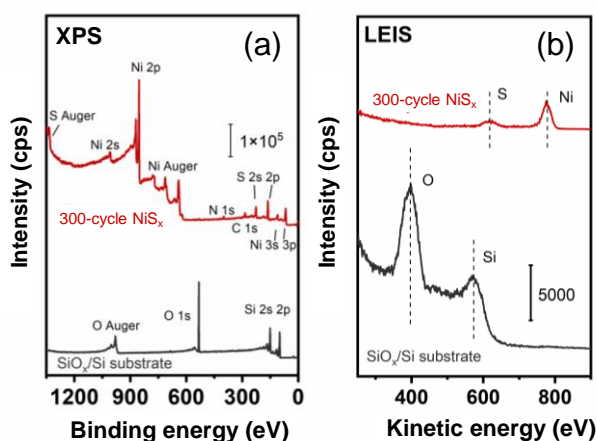

**Figure S7.** (a) XPS and (b) LEIS spectra collected on a bare  $\text{SiO}_x/\text{Si}$  substrate and the substrate covered by 300 ALD cycles of  $\text{NiS}_x$ .

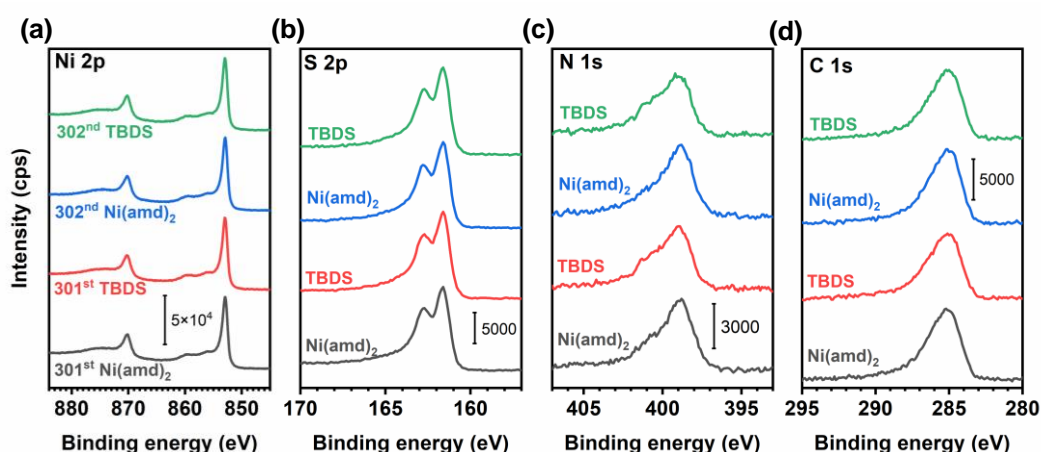

**Figure S8.** In situ XPS spectra of (a) Ni 2p, (b) S 2p, (c) N 1s, and (d) C 1s taken after the doses of  $\text{Ni(amd)}_2$  and TBDS in the 301<sup>st</sup> and 302<sup>nd</sup> half-cycles. The similarity of the spectra for the 301<sup>st</sup> and 302<sup>nd</sup> half-cycles indicates that the data were reproducible.

**Table S2.** Fitting parameters for the N 1s and C 1s XPS spectra shown in Figure 3d,e

|                      | N 1s        |           |               |           |             |            |               |           |                | C 1s           |
|----------------------|-------------|-----------|---------------|-----------|-------------|------------|---------------|-----------|----------------|----------------|
|                      | Component 1 |           |               |           | Component 2 |            |               |           | 1+2            | TA<br>(cps eV) |
|                      | BE<br>(eV)  | W<br>(eV) | A<br>(cps eV) | RI<br>(%) | BE<br>(eV)  | W<br>(eV)  | A<br>(cps eV) | RI<br>(%) | TA<br>(cps eV) |                |
| Ni(amd) <sub>2</sub> | 398.9       | 1.9       | 9542.4        | 74.1      | 400.9       | <b>1.9</b> | 3339.5        | 25.9      | 12881.9        | 25780.5        |
| TBDS                 | 399.0       | 1.9       | 8229.8        | 68.7      | 401.0       | <b>1.9</b> | 3748.3        | 31.3      | 11978.1        | 24223.5        |

\* BE= Binding Energy, W= Width, A= Area, RI= Relative Intensity, TA= Total Area. Bold font values stand for fixed parameters.

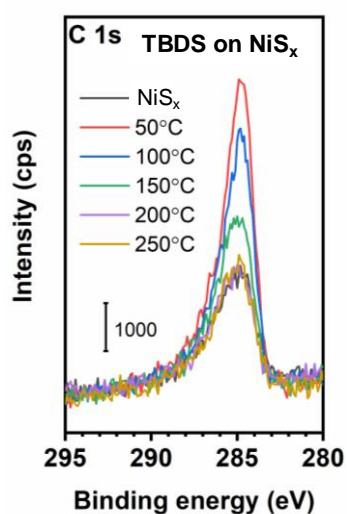

**Figure S9.** As-collected C 1s XPS spectra for a TBDS-dosed NiS<sub>x</sub> substrate subjected to heat treatments at various temperatures. Before dosing TBDS, the NiS<sub>x</sub> substrate was annealed at 350 °C to liberate most of the surface organic species, and the XPS spectrum of the annealed NiS<sub>x</sub> substrate was used as the background to obtain Figure 4a.

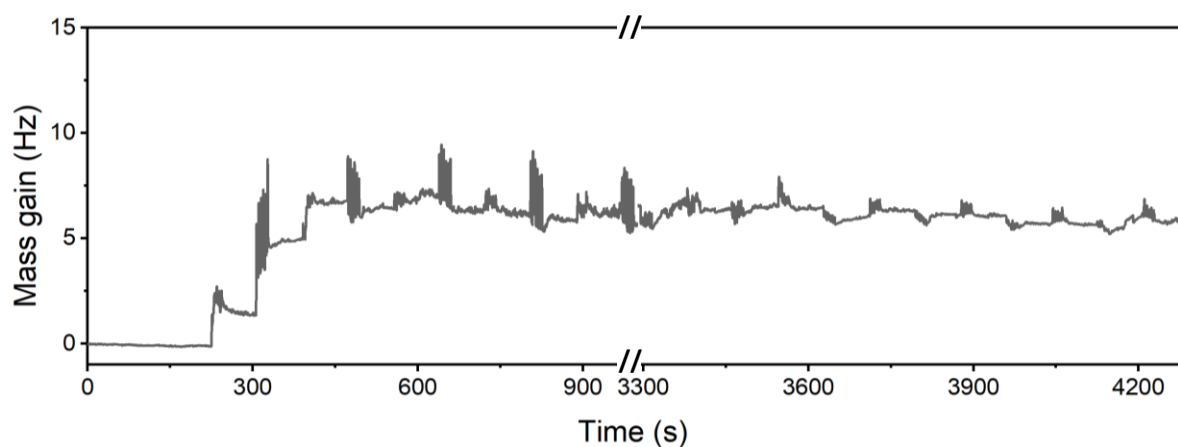

**Figure S10.** Trace of the in-situ QCM mass gain during the ALD at 150 °C.



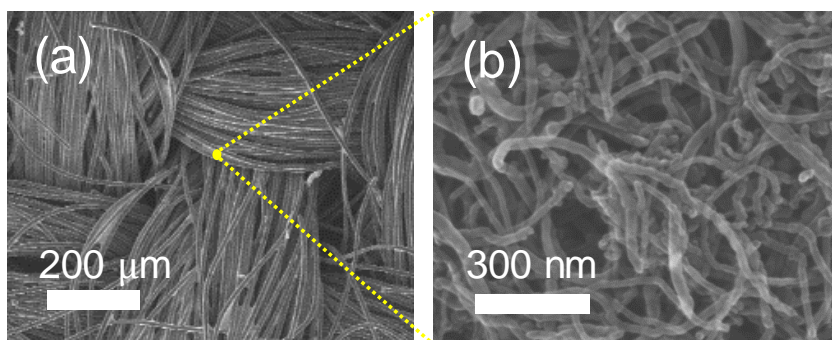

**Figure S11.** (a) SEM image of the CNT/CC electrode. (b) High-resolution SEM image showing the network of the carbon nanotubes on the carbon cloth.

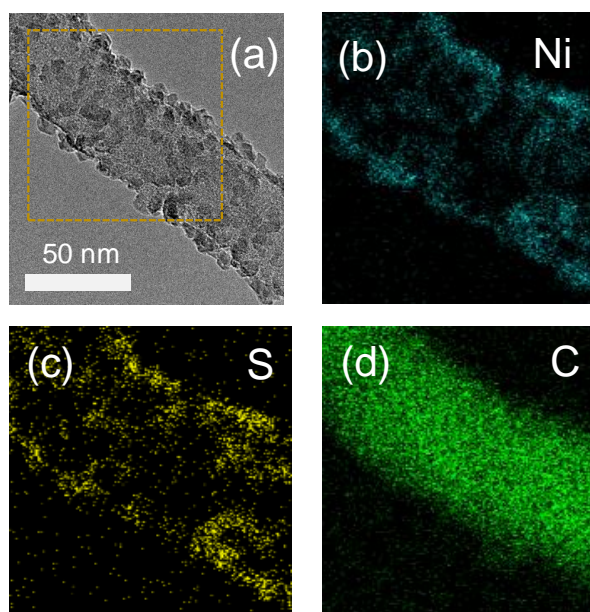

**Figure S12.** (a) TEM image and the corresponding EDS elemental maps of (b) Ni, (c) S, and (d) C, showing an ~8 nm ALD  $\text{NiS}_x$  film coated on a carbon nanotube of the CNT/CC electrode.

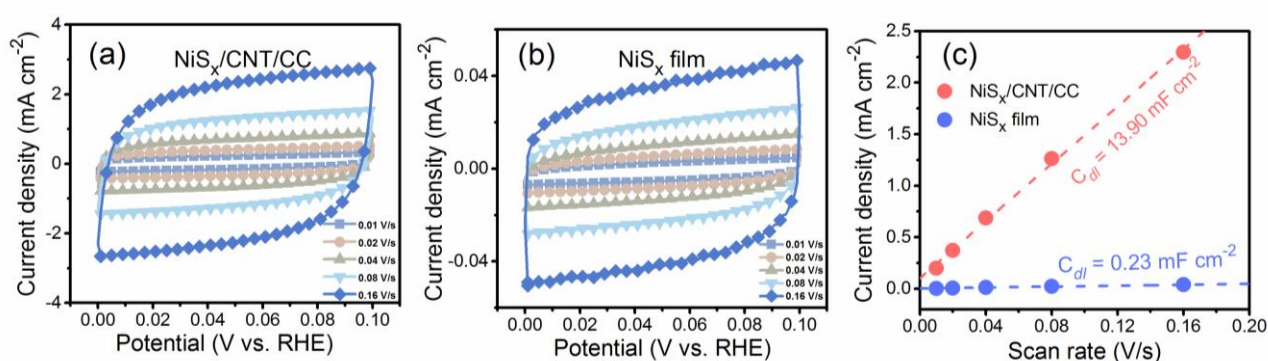

**Figure S13.** Measurements of the electrode electrochemical double-layer capacitances ( $C_{dl}$ ) by cyclic voltammetry (CV). CV curves for (a) the  $\text{NiS}_x/\text{CNT}/\text{CC}$  and (b) thin-film  $\text{NiS}_x$  electrodes. The CV scans were conducted in the non-Faradic region of 0 to 0.1 V (vs. RHE) with the scan rates of 0.01, 0.02, 0.04, 0.08, and 0.16 V/s. (c) Plot of the current densities with respect to the scan rate for both electrodes.  $C_{dl}$  were extracted from the slopes of the linear fits, to be 13.90 and 0.23  $\text{mF cm}^{-2}$  for the  $\text{NiS}_x/\text{CNT}/\text{CC}$  and thin-film  $\text{NiS}_x$  electrodes, respectively. The former was 60.4 times larger than the latter.

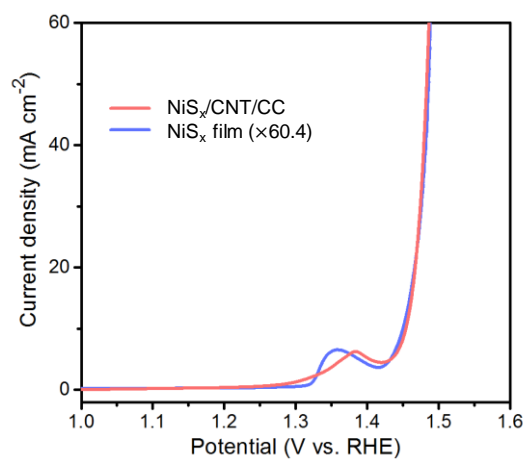

**Figure S14.** To account for the enlarged surface area of the NiS<sub>x</sub>/CNT/CC electrode, the LSV curve of the thin-film NiS<sub>x</sub> electrode (Figure 6d) is multiplied by a factor of 60.4. The resultant curve overlaps well with the measured curve of the NiS<sub>x</sub>/CNT/CC electrode, which suggests that the enhanced electrocatalytic performance of the NiS<sub>x</sub>/CNT/CC electrode was because of the enhancement of the catalyst surface area.

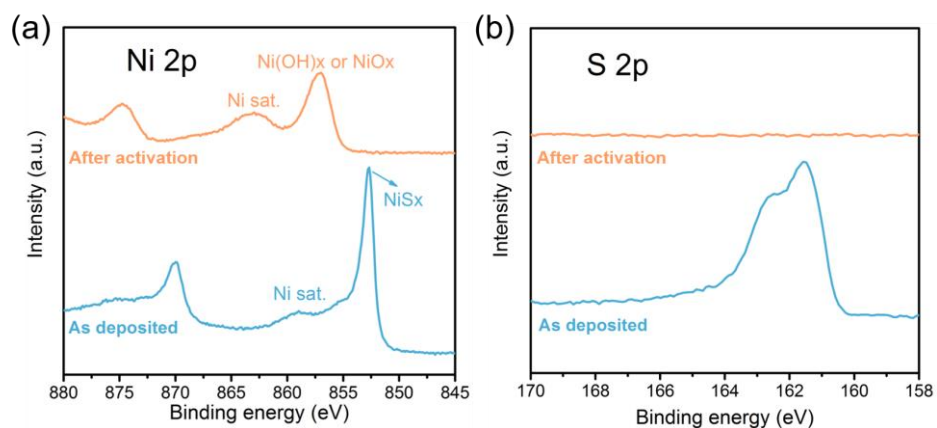

**Figure S15.** (a) Ni 2p and (b) S 2p XPS spectra for an as-deposited NiS<sub>x</sub>/CNT/CC electrode and the electrode after electrochemical activation.



**Table S3.** Comparison of the OER performance for various reported Ni-based electrocatalysts.

| Catalyst                                                                       | Overpotential ( $\eta$ )<br>@ 10 mA cm <sup>-2</sup> | Tafel slope<br>(mV/decade) | Reference                                                    |
|--------------------------------------------------------------------------------|------------------------------------------------------|----------------------------|--------------------------------------------------------------|
| NiS <sub>x</sub> /CNT/CC                                                       | 221                                                  | 48                         | This work                                                    |
| ALD NiS <sub>x</sub> film                                                      | 303                                                  | 48                         | This work                                                    |
| ALD Ni <sub>9</sub> S <sub>8</sub> film                                        | 353                                                  | 56                         | <i>Chem. Mater.</i> <b>2016</b> ,<br>28, 1155                |
| Ni <sub>3</sub> Se <sub>2</sub> /Ni foam                                       | 270                                                  | 142.8                      | <i>Energy &amp; Environ.<br/>Sci.</i> <b>2016</b> , 9, 1771  |
| NiCoP/C nanoboxes                                                              | 330                                                  | 96                         | <i>Angew. Chem. Int. Ed.</i><br><b>2017</b> , 129, 3955      |
| Fe-doped<br>NiO <sub>x</sub> nanotubes                                         | 310                                                  | 49                         | <i>Nano Energy</i> <b>2017</b> ,<br>38, 167                  |
| NiB <sub>0.45</sub> /Cu                                                        | 296                                                  | 58                         | <i>Nano Energy</i> <b>2017</b> ,<br>38, 175                  |
| NGO/Ni <sub>7</sub> S <sub>6</sub>                                             | 381                                                  | 45                         | <i>Adv. Funct. Mater.</i><br><b>2017</b> , 27, 1700451       |
| Ni-Ni <sub>3</sub> S <sub>2</sub> @carbon<br>nanoplates                        | 285                                                  | 56                         | <i>Small</i> <b>2019</b> , 15,<br>1900348                    |
| NiS <sub>x</sub> nanoparticles                                                 | 301                                                  | 41                         | <i>ChemCatChem</i> <b>2019</b> ,<br>11, 1205                 |
| Ni <sub>0.88</sub> Co <sub>1.22</sub> Se <sub>4</sub> hollow<br>microparticles | 340                                                  | 78                         | <i>Chem. Mater.</i> <b>2017</b> ,<br>29, 7032                |
| Electrochemically<br>oxidized Ni-sulfide<br>foam                               | 256                                                  | 41                         | <i>Appl. Catal. B</i> <b>2018</b> ,<br>233, 130              |
| NiFeO <sub>x</sub>                                                             | 245                                                  | 34                         | <i>ACS Cent. Sci.</i> <b>2019</b> ,<br>5, 3, 558             |
| Ni <sub>3</sub> N/Ni <sub>2</sub> P/BP                                         | 247                                                  | 78                         | <i>J. Mater. Chem. A</i> ,<br><b>2019</b> , 7, 22063         |
| Ni <sub>3</sub> S <sub>2</sub> nanosheet array                                 | 260                                                  | N/A                        | <i>J. Am. Chem.<br/>Soc.</i> <b>2015</b> , 137, 44,<br>14023 |
| Ni <sub>2</sub> P/carbon paper                                                 | 280                                                  | 48                         | <i>ACS Catal.</i> <b>2017</b> , 7, 8,<br>5450                |
| Ni <sub>2</sub> P/CoN-porous<br>carbon                                         | 270                                                  | 65                         | <i>Chem. Commun.</i> ,<br><b>2018</b> , 54, 12101            |
